# Supplementary material for: The incidence of chronic pain following Cesarean section and associated risk factors: A cohort of women followed up for three months
Source: PubMed Central journal article supplement (PMC7473578; doi:10.1371/journal.pone.0238634), 2020-09-04
Supplement: pone.0238634.s001.pdf [file pone.0238634.s001.pdf]

S1 Table: Medication received postoperatively during hospitalization.

| Medication received as pain relief <sup>a</sup>             | Women (n=620) |       |
|-------------------------------------------------------------|---------------|-------|
|                                                             | n             | %     |
| <b>Simple analgesics<sup>b</sup></b>                        | 612           | 99.7  |
| Dipyrone                                                    | 607           | 99.2  |
| Acetaminophen                                               | 5             | 0.8   |
| <b>NSAIDs<sup>c</sup></b>                                   | 571           | 93.3  |
| Diclofenac sodium                                           | 568           | 99.5  |
| Tenoxicam                                                   | 111           | 19.4  |
| <b>Opioids<sup>b</sup></b>                                  | 5             | 0.8   |
| Tramadol                                                    | 5             | 100.0 |
| <b>Combination drugs<sup>b</sup></b>                        | 5             | 0.8   |
| Caffeine + carisoprodol + diclofenac sodium + acetaminophen | 4             | 80.0  |
| Codeine phosphate + acetaminophen                           | 1             | 20.0  |

<sup>a</sup>The women may have taken more than one type of pain relief medication; <sup>b</sup>Data missing=6; <sup>c</sup>Data missing=8; NSAIDs: Non-steroidal anti-inflammatory drugs.
