# Supplementary material for: The incidence of chronic pain following Cesarean section and associated risk factors: A cohort of women followed up for three months
Source: PubMed Central journal article supplement (PMC7473578; doi:10.1371/journal.pone.0238634), 2020-09-04
Supplement: pone.0238634.s002.pdf [file pone.0238634.s002.pdf]

S2 Table: Use of medication by the women with pain on the 7<sup>th</sup> day following surgery (n=434).

| Pain relief medications <sup>a</sup>                             | Women (n=434) <sup>b</sup> |      |
|------------------------------------------------------------------|----------------------------|------|
|                                                                  | n                          | %    |
| <b>Use of pain relief medication</b>                             | 409                        | 95.8 |
| <b>Simple Analgesics</b>                                         | 319                        | 78.0 |
| Dipyrone                                                         | 306                        | 95.9 |
| Acetaminophen                                                    | 16                         | 5.0  |
| <b>NSAIDs</b>                                                    | 335                        | 81.7 |
| Diclofenac sodium                                                | 328                        | 97.9 |
| Nimesulide                                                       | 6                          | 1.8  |
| Naproxen                                                         | 1                          | 0.3  |
| Ibuprofen                                                        | 1                          | 0.3  |
| <b>Combination drugs</b>                                         | 8                          | 2.0  |
| Caffeine + carisoprodol + diclofenac sodium + acetaminophen      | 2                          | 25.0 |
| Dipyrone + promethazine hydrochloride + adiphenine hydrochloride | 5                          | 62.5 |
| Carisoprodol + diclofenac sodium + acetaminophen + caffeine      | 1                          | 12.5 |

<sup>a</sup> The women may have taken more than one type of pain relief medication; <sup>b</sup> Data missing=7; NSAIDs: Non-steroidal anti-inflammatory drugs.
