# Supplementary material for: The incidence of chronic pain following Cesarean section and associated risk factors: A cohort of women followed up for three months
Source: PubMed Central journal article supplement (PMC7473578; doi:10.1371/journal.pone.0238634), 2020-09-04
Supplement: pone.0238634.s003.pdf [file pone.0238634.s003.pdf]

S3 Table: Use of medication by the women with pain on the 30<sup>th</sup> day following surgery (n=173).

| Pain relief medications <sup>a</sup>                 | Women (n=173) <sup>b</sup> |       |
|------------------------------------------------------|----------------------------|-------|
|                                                      | n                          | %     |
| <b>Use of pain relief medication</b>                 | 58                         | 36.0  |
| <b>Simple Analgesics</b>                             | 39                         | 67.2  |
| Dipyrone                                             | 34                         | 87.2  |
| Acetaminophen                                        | 5                          | 12.8  |
| <b>NSAIDs</b>                                        | 26                         | 44.8  |
| Diclofenac sodium                                    | 24                         | 92.3  |
| Ibuprofen                                            | 1                          | 3.8   |
| Nimesulide                                           | 1                          | 3.8   |
| <b>Combination drugs</b>                             | 1                          | 1.7   |
| Dipyrone + orphenadrine citrate + anhydrous caffeine | 1                          | 100.0 |

<sup>a</sup> The women may have taken more than one type of pain relief medication; <sup>b</sup> Data missing=12; NSAIDs: Non-steroidal anti-inflammatory drugs.
