# Supplementary material for: The incidence of chronic pain following Cesarean section and associated risk factors: A cohort of women followed up for three months
Source: PubMed Central journal article supplement (PMC7473578; doi:10.1371/journal.pone.0238634), 2020-09-04
Supplement: pone.0238634.s004.pdf [file pone.0238634.s004.pdf]

S4 Table: Use of medication by the women with pain on the 60<sup>th</sup> day following surgery (n=147).

| Pain relief medications <sup>a</sup>                        | Women (n=147) <sup>b</sup> |       |
|-------------------------------------------------------------|----------------------------|-------|
|                                                             | n                          | %     |
| <b>Use of pain relief medication</b>                        | 22                         | 15.5  |
| <b>Simple Analgesics</b>                                    | 12                         | 54.5  |
| Dipyrone                                                    | 11                         | 91.7  |
| Acetaminophen                                               | 1                          | 8.3   |
| <b>NSAIDs</b>                                               | 10                         | 45.5  |
| Diclofenac sodium                                           | 9                          | 90.0  |
| Nimesulide                                                  | 1                          | 10.0  |
| <b>Combination drugs</b>                                    | 1                          | 4.5   |
| Caffeine + carisoprodol + diclofenac sodium + acetaminophen | 1                          | 100.0 |

<sup>a</sup> The women may have taken more than one type of pain relief medication; <sup>b</sup> Data missing=5; NSAIDs: Non-steroidal anti-inflammatory drugs.
