# Supplementary material for: The incidence of chronic pain following Cesarean section and associated risk factors: A cohort of women followed up for three months
Source: PubMed Central journal article supplement (PMC7473578; doi:10.1371/journal.pone.0238634), 2020-09-04
Supplement: pone.0238634.s005.pdf [file pone.0238634.s005.pdf]

S5 Table: Use of medication by the women with pain on the 90<sup>th</sup> day following surgery (n=118).

| Pain relief medications <sup>a</sup>                             | Women (n=118) <sup>b</sup> |      |
|------------------------------------------------------------------|----------------------------|------|
|                                                                  | n                          | %    |
| <b>Use of pain relief medication</b>                             | 19                         | 17.0 |
| <b>Simple Analgesics</b>                                         | 11                         | 57.9 |
| Dipyrone                                                         | 10                         | 90.9 |
| Acetaminophen                                                    | 1                          | 9.1  |
| <b>NSAIDs</b>                                                    | 7                          | 36.8 |
| Diclofenac sodium                                                | 5                          | 71.4 |
| Nimesulide                                                       | 1                          | 14.3 |
| Ibuprofen                                                        | 1                          | 14.3 |
| <b>Combination drugs</b>                                         | 2                          | 10.5 |
| Caffeine + carisoprodol + diclofenac sodium + acetaminophen      | 1                          | 50.0 |
| Dipyrone + adiphenine hydrochloride + promethazine hydrochloride | 1                          | 50.0 |

<sup>a</sup> The women may have taken more than one type of pain relief medication; <sup>b</sup> Data missing=6; NSAIDs: Non-steroidal anti-inflammatory drugs.
